1  
2  
3  
4  
5  
6  
7  
8  
9  
10  
11  
12  
13  
14  
15  
16  
17  
18  
19  
20  
21  
22  
23  
24  
25

Corresponding Author:  
Dr. Megan L. Fritz  
Department of Entomology  
University of Maryland  
4291 Field House Dr.  
Plant Sciences Bldg. Rm. 4112  
College Park, MD 20742  
mfritz13@umd.edu

**Contemporary evolution of a Lepidopteran species, *Heliothis virescens*, in response to modern agricultural practices**

Megan L Fritz<sup>1,2,§</sup>, Alexandra M DeYonke<sup>2</sup>, Alexie Papanicolaou<sup>3</sup>, Stephen Micinski<sup>4</sup>, John Westbrook<sup>5</sup>, and Fred Gould<sup>2</sup>

<sup>1</sup>Department of Entomology, University of Maryland, College Park, MD 20742 USA

<sup>2</sup>Department of Entomology, North Carolina State University, Raleigh, NC 27607 USA

<sup>3</sup>Hawkesbury Institute for the Environment, Sydney Australia

<sup>4</sup>Louisiana State University AgCenter, Red River Research Station, Bossier City, LA 71112 USA

<sup>5</sup>USDA Agricultural Research Service, College Station, TX 77845 USA

<sup>§</sup>Corresponding Author

26 **Abstract**

27       Adaptation to human-induced environmental change has the potential to profoundly influence  
28 the genomic architecture of affected species. This is particularly true in agricultural ecosystems, where  
29 anthropogenic selection pressure is strong. *Heliothis virescens* feeds on cotton in its larval stages and  
30 US populations have been declining since the widespread planting of transgenic cotton, which  
31 endogenously express proteins derived *Bacillus thuringiensis* (Bt). No physiological adaptation to Bt  
32 toxin has been found in the field, so adaptation to this altered environment could involve: 1) shifts in  
33 host plant selection mechanisms to avoid cotton, 2) changes in detoxification mechanisms required for  
34 cotton-feeding versus feeding on other host plants, or 3) loss of resistance to previously used  
35 management practices including insecticides. Here we begin to address the question of whether such  
36 changes occurred in *H. virescens* populations between the years 1997 and 2012. As part of our study,  
37 we produced an *H. virescens* genome assembly and used this in concert with a ddRAD-seq enabled  
38 genome scan to identify loci with significant allele frequency changes over the 15 year period after Bt  
39 crops became widespread in the agricultural landscape. Confirmation that a known genetic change at a  
40 previously described *H. virescens* target of selection was detectable in our genome scan increased our  
41 confidence in this methodology. We quantified the strength of selection required to elicit the observed  
42 allele frequency changes at loci under selection. Potential contributions of genes near the loci under  
43 selection and their to adaptive phenotypes in the *H. virescens* cotton system are discussed.

44

45 **Key Words**

46 *Heliothis virescens*, tobacco budworm, *Bacillus thuringiensis*, cotton, selective sweep

## 47 **Introduction**

48           Human-induced change in the natural landscape places strong selective pressure on populations  
49 to adapt over relatively short evolutionary timescales (Palumbi 2001). These changes shape the  
50 genomes of local species, providing insight into contemporary evolution and its implications for  
51 affected species. Cultivation of the natural landscape for agricultural purposes is one of the most  
52 ubiquitous examples of human-induced environmental change. Modern agricultural practices often  
53 involve sweeping changes to the composition of plant species across broad geographic regions, re-  
54 sculpting of the physical terrain and chemical inputs into the environment (Tilman 2001). The strong  
55 selective pressure placed on species that inhabit agricultural ecosystems make them ideal for examining  
56 genetic responses to anthropogenic forces (Taylor *et al.* 1995).

57           One such major change in recent agricultural history is the commercialization of transgenic  
58 crops that themselves produce proteins for the management of key insect species. The tobacco  
59 budworm, *Heliothis virescens*, feeds on cotton in its larval stages and populations in the Southern  
60 United States have been declining since the widespread planting of transgenic cotton (Supplementary  
61 Figure 1). These cotton cultivars endogenously express insecticidal proteins derived from the bacterium  
62 *Bacillus thuringiensis* (Bt), which are lethal to *H. virescens*. In the Southern United States, Bt-  
63 expressing cotton was rapidly adopted after it became commercially available for management of *H.*  
64 *virescens* in 1996 (James 2015; Supplementary Figure 2). Prior to the widespread use of Bt-expressing  
65 cotton, populations of *H. virescens* had evolved resistance to every insecticide used for their  
66 management (Blanco 2012), including pyrethroid insecticides (Luttrell *et al.* 1987, Campanhola and  
67 Plapp 1989). Concerns over the possibility that *H. virescens* and other insect targets of Bt crops would  
68 evolve resistance to the endogenously expressed proteins spawned an entire field of research related to  
69 Bt resistance and associated genetic mechanisms (Reviewed in Heckel *et al.* 2007, Tabashnik *et al.*

70 2013). Of primary concern was the loss of efficacy of toxic Bt proteins (USEPA 1998, 2001, 2006). In  
71 the case of *H. virescens*, no physiological adaptation to the Bt toxin in cotton fields has been detected  
72 (Tabashnik *et al.* 2013). Yet widespread adoption of Bt-expressing crops likely placed selective  
73 pressure on *H. virescens* in other ways.

74 As one example, widespread planting of Bt cotton cultivars led to an overall decline in  
75 insecticide use on cotton in the United States (NASEM 2016, Benbrook 2012), including the use of  
76 pyrethroids (personal comm. D. Reisig). In 1999, North Carolina extension entomologists stopped  
77 recommending pyrethroids for the damaging generations of *H. virescens* in cotton (Bachelier 1999) and  
78 still do not recommend pyrethroids. Similarly, in Louisiana, pyrethroids are no longer recommended  
79 for *H. virescens* (LSU Ag Center 2016). In the state of California, one of the only states that makes  
80 records of pesticide sales and applications publicly available, the pounds per acre of cotton for three  
81 commonly used pyrethroids (deltamethrin, cypermethrin and cyfluthrin) declined from 0.05 to 0.03  
82 between the years 2000 and 2012 (<http://calpip.cdpr.ca.gov>), and it is not clear if any of these  
83 pyrethroids sprays are currently used to target *H. virescens*. Prior to Bt cotton adoption, when  
84 pyrethroids were heavily used to suppress *H. virescens* populations, the voltage-gated sodium channel  
85 gene (*Vgsc*) was identified as one gene target of selection wherein pyrethroid resistance alleles rose to  
86 high frequency (Park and Taylor 1997, Park *et al.* 1997). Yet in *H. virescens* and other insect species,  
87 *Vgsc* mutations often result in an overall loss of fitness for individuals carrying them (Zhao *et al.* 2000,  
88 Foster *et al.* 2005, Kliot and Ghanim 2012, Brito *et al.* 2013). Under these conditions, stability in the  
89 frequency of insecticide resistance alleles depends upon whether or not populations are continually  
90 exposed to insecticidal pressure. Therefore, one possible effect of Bt adoption in *H. virescens* is a  
91 reversion to susceptibility at their pyrethroid resistance locus.

92 Additional inadvertent targets of selection by Bt-expressing cotton could include loci involved

93 in feeding and oviposition behaviors. *H. virescens* are well known for the damage they cause to  
94 cultivated cotton (reviewed in Blanco 2012), but their host plant range includes tobacco, soybean,  
95 garbanzo bean (Fitt 1989), and a number of wild hosts (Sudbrink and Grant 1995). Heritable, intra-  
96 specific variation in host choice has been observed for *H. virescens* (Sheck and Gould 1993, Sheck and  
97 Gould 1995, Karpinski *et al.* 2014), as well as other closely-related Lepidopteran species (Jallow and  
98 Zalucki 1996, Jallow *et al.* 2004, Oppenheim *et al.* 2012). It is possible that the introduction of Bt-  
99 expressing cotton has selected against *H. virescens* individuals that preferentially oviposit and feed  
100 upon cotton hosts plants. Allele frequency changes in genes associated with chemosensation, central  
101 nervous system function, and metabolism may have occurred as *H. virescens* was driven off of its  
102 primary cotton host plant (Blanco 2012).

103 In recent years, identifying genomic change in response to selective forces has been enabled by  
104 the development of next-generation sequencing (NGS) technologies. A variety of NGS-enabled marker  
105 development techniques are used to generate novel, high density marker sets for model and non-model  
106 organisms, including Restriction-site Associated DNA sequencing (RAD-seq; Baird *et al.* 2008),  
107 Genotyping-by-Sequencing (GBS; Elshire *et al.* 2011), double-digest RAD-seq (ddRAD-seq; Peterson  
108 *et al.* 2012) and others (reviewed in Andrews *et al.* 2016). These marker sets enable scientists to scan  
109 the genomes of field-collected organisms in search of the gene targets of selection, particularly where  
110 selection is strong and a reference genome assembly for read alignment is available (Lowry *et al.* 2017,  
111 Catchen *et al.* 2017). Strong selection for advantageous alleles at target genes can influence allelic  
112 composition at physically linked neutral sequences, including nearby marker sites, resulting in a  
113 genomic footprint of selection that is much broader than the target gene alone (Nielsen 2005). The  
114 breadth of this genomic footprint is influenced by several factors, including the strength of selection,  
115 the initial frequency of the advantageous allele, effective pest population size and recombination rate

116 (Charlesworth and Charlesworth 2010).

117           Here we scanned the genomes of two *H. virescens* field populations collected in the Southern  
118 United States between the years 1997 and 2012 to detect loci that have changed over time. Given that  
119 pesticides and transgenic crops impose very strong selection on their target pest species (Onstad 2014),  
120 we initially focused on a genomic region known to be associated with insecticide resistance as a  
121 confirmation that ddRAD-seq could be used identify genes responsible for adaptive phenotypes under  
122 strong selection. To achieve this goal, we produced an annotated draft assembly of the *H. virescens*  
123 genome and used it for alignment of ddRAD-seq reads from barcoded individuals collected across  
124 space and time. We then tested the hypothesis that changes in a candidate pyrethroid resistance gene,  
125 *Vgsc*, could be detected through our ddRAD-enabled genome scanning techniques. Furthermore, we  
126 identified additional ddRAD-seq loci with strongly diverging marker allele frequencies, and quantified  
127 the strength of selection required to produced the observed changes at these sites. Some of the ddRAD-  
128 seq loci identified as under selection were linked to genes involved in toxin metabolism and  
129 chemosensation. We concluded with a discussion of the adaptive phenotypes that these newly  
130 identified gene targets of selection might represent in a field environment.

131

## 132 **Methods**

### 133 *Insect Material*

134           For all population genomic analyses, adult male moths were collected by pheromone-baited trap  
135 from Bossier Parish, LA, and Burleson County, TX. Collections took place in LA from May through  
136 September, and in TX from May through October, in the years 1997, 2002, 2007, and 2012. GPS  
137 coordinates from trapping locations can be found in Supplementary Table 1. Moths from each  
138 collection date and location were immediately placed together in bottles of 95% ethanol for long-term

139 storage. Bottles from 2002, 2007 and 2012 were always held at -20°C until specimens were used,  
140 while those from 1997 were initially held at room temperature and then transferred to -20°C. To  
141 develop our *H. virescens* genome assembly, individuals from a long-standing colony strain (Gould *et*  
142 *al.* 1995) were sib-mated for 10 generations to produce inbred material for sequencing (Fritz *et al.*  
143 2016). Siblings from a single inbred family were used for sequencing and analysis. Five sibling pupae  
144 were stored at -80°C prior to DNA isolation and library preparation. For all insect samples, DNA was  
145 isolated with a Qiagen Blood and Tissue Kit (Qiagen, Inc., Valencia, CA, U.S.A.) using the mouse tail  
146 protocol.

147

#### 148 *H. virescens* Candidate Gene Approach

149 A polymerase chain reaction (PCR) based upon the methods of Park and Taylor (1997) was  
150 used to amplify a 432 bp region in the alpha subunit of the *Vgsc*. The primer pair Nhp3304+ (5'  
151 ATGTG GGACT GIATG TTGGT) and Nhp3448- (5' CTGTT GAAGG CCTCT GCTAT) flanked a  
152 mutation known as L1029H. In this targeted region of the *Vgsc*, a single nucleotide polymorphism  
153 (SNP) caused a Leucine to Histidine amino acid substitution and thereby pyrethroid resistance.  
154 Additional mutations associated with pyrethroid resistance have been detected in *H. virescens*,  
155 including D1561V + E1565G and V421M (Rinkevich *et al.* 2013). We specifically targeted L1029H  
156 for our research because D1561V+ E1565G has not yet been functionally confirmed using ectopic  
157 expression assays (Rinkevich *et al.* 2013), and V421M was not found in our study populations, even in  
158 1997 when phenotypic pyrethroid resistance was at its peak.

159 Amplicons from PCRs targeting the L1029H mutation were digested by restriction enzyme Nla-  
160 III, which cut in the presence of the resistance allele (Supplementary Figure 3). Genotypes were scored  
161 by visualizing the digested PCR products on a 3.5% agarose gel (90 to 120 min at 120 V). We

162 examined the genotypes at this pyrethroid resistance locus for *H. virescens* individuals collected from  
163 1997 (n = 194), 2002 (n = 204), 2007 (n = 268), and 2012 (n = 194) in LA, and 1997 (n = 142), 2007 (n  
164 = 120), and 2012 (n = 196) in TX. Changes in pyrethroid resistance allele frequencies over time and  
165 space were examined using a series of nested generalized linear regression models with binomial error  
166 structures in R version 3.1.2 (R Core Team 2014; used here and throughout). The following full model  
167 was used to examine the frequency of individual pyrethroid resistance alleles (*i*):

$$\Pr(y_i = 1) = \text{logit}^{-1}(\beta_{0i} + \beta_1 \text{Year}_i + \beta_2 \text{Season}_i + \beta_3 \text{Location}_i + \beta_4 \text{Year} \times \text{Season}_i),$$

168  
169 for  $i = 1, \dots, n$

170 where Year represented collection year (e.g. 1997, 2002, 2007, or 2012), Season represented whether  
171 the collections were made early (May or June) or late (August through October) in the cotton growing  
172 season, and Location represented the collection location of the samples. We identified a model term as  
173 statistically significant ( $\alpha = 0.05$ ) when a comparison of nested models by analysis of deviance  
174 indicated that removal of that term significantly influenced model deviance.

175

#### 176 *Strength of Selection against the Vgsc Resistance Allele*

177 Following the discovery of a decline in frequency of the pyrethroid resistance allele, we quantified the  
178 strength of selection associated with the decline in pyrethroid pressure. We used the following  
179 equation to calculate the selection coefficient against the recessive resistance allele for our field  
180 populations from TX and LA over 15 years after the introduction of Bt cotton into the landscape:

$$\Delta p = \frac{s p q^2}{1 - s q^2}$$

183 where *p* was the frequency of the susceptible allele, *q* was the frequency of the resistance allele, and *s*  
184 was the selection coefficient. To calculate the change in *p* over 1 generation, we took the difference in



185 allele frequency over the 15 year period, and divided it by the total number of generations. For this, we  
186 assumed 4 generations (Barber 1937) per year for each of the 15 years examined.

187

### 188 *Illumina WGS Library Preparation and Sequencing*

189 Genomic DNA from one pupa was submitted to the North Carolina State Genomic Sciences  
190 Laboratory (Raleigh, NC, USA) for Illumina paired-end (PE) library construction and sequencing.  
191 Prior to library preparation, the DNA template was quantified by a Qubit 2.0 Fluorometer (Invitrogen,  
192 USA). The PE library with an 800bp insert size was constructed using an Illumina TruSeq Nano  
193 Library Kit (Illumina, Inc. San Diego, CA) according to standard protocol. Following enrichment by  
194 PCR, the library was checked for quality and final concentration using an Agilent 2100 Bioanalyzer  
195 (Agilent Technologies, USA) with a High Sensitivity DNA chip before sequencing on an Illumina  
196 HiSeq 2500 (100x2 paired end, rapid run).

197 Genomic DNA from a second pupa was used for mate-pair (MP) sequencing. Prior to library  
198 preparation, whole genomic DNA was run out on a 0.5% agarose gel at 130v for 2 hours. Fragments  
199 8kb or larger, as compared with Hyperladder I (BioLone USA Inc. Tauton, MA, U.S.A), were excised  
200 from the gel and purified using a Zymoclean large fragment recovery kit (Zymo Research Corp. Irvine,  
201 CA, U.S.A.). The DNA sample was submitted to the Michigan State University Research and  
202 Technology Support Facility (East Lansing, MI, USA) for 8kb MP library preparation and sequencing.  
203 The DNA library was prepared using an Illumina Nextera Mate Pair Sample Preparation Kit according  
204 to standard protocol. The library was validated using a Qubit dsDNA assay, Caliper LabChipGX  
205 (Perkin Elmer, Waltham, MA, U.S.A.) and Kapa Library Quantification qPCR for Illumina Libraries.  
206 The library was loaded on one lane of an Illumina HiSeq 2500 High Output flow cell and sequenced in  
207 a 2x125bp paired-end format using HiSeq SBS version 4 reagents. For both PE and MP libraries, base

208 calling was done by Illumina Real Time Analysis v1.18.64, the output of which was converted to FastQ  
209 format with Illumina Bcl2fastq v1.8.4.

210

### 211 *PacBio Library Preparation and Sequencing*

212 Genomic DNA from 4 pupae, one of which was also used for Illumina PE sequencing, were  
213 prepared into two libraries for PacBio sequencing. For each library, the SMRTbell Template  
214 Preparation Kit version 1.0 (Pacific Biosciences, Menlo Park, CA, U.S.A.) was used for gDNA  
215 preparation, but shearing and size-selection steps differed. For the first library, shearing was minimal  
216 and no size selection was performed. For the second library, shearing prior to DNA concentration was  
217 avoided to maximize fragment length, and a BluePippin (Sage Science Inc., Beverly, MA, U.S.A.) was  
218 used to select fragments that were at least 7kb long. This produced sufficient prepared library material  
219 for 17 and 5 SMRT cells, respectively. Prior to sequencing, the library concentration and fragment  
220 length profiles were checked on a Qubit 2.0 and an Agilent TapeStation 2200 (Agilent Technologies,  
221 USA) with a high molecular weight tape. Both libraries were sequenced at the University of North  
222 Carolina Chapel Hill Sequencing facility on a PacBio RS II.

223

### 224 *H. virescens Genome Assembly*

225 Read quality was checked for all Illumina data using FastQC (Babraham Bioinformatics,  
226 Cambridge, UK). Low quality ends were trimmed from both PE and MP reads using trimmomatic (v.  
227 0.32; Bolger *et al.* 2014) and cutadapt (v. 1.9.1; Martin 2011), respectively. Any remaining Illumina  
228 adapter sequences and Nextera transposon sequences were also removed. Reads were filtered for  
229 potential microbial contaminants and *H. virescens* mitochondrial DNA (Supplementary Data File 1)  
230 using BBmap (version 35.10; Bushnell B. - [sourceforge.net/projects/bbmap/](https://sourceforge.net/projects/bbmap/)). For the full list of the

231 screened contaminants, see Supplementary Table 2. SOAPdenovo2 (v. 2.04) was used for assembly,  
232 scaffolding and gap closure (Luo *et al.* 2012) with a k-mer length set to 63. Contigs and scaffolds over  
233 2kb were used for further analysis.

234 RepeatScout (version 1.0.5; Price *et al.* 2005) was used to find *de novo*, species-specific repeats  
235 in the K63 assembly, while RepeatMasker (version open-4.0; Smit *et al.* 2013) was used to identify  
236 other common insect repeats available from Repbase (version 20150807; Jurka *et al.* 2005). We soft-  
237 masked both repeat classes using BEDTools (version 2.25.0; Quinlan and Hall 2010) and collapsed  
238 redundant haplotypes using the default settings in Haplomerger2 (version 3.1; Huang *et al.* 2012). To  
239 fill intra-scaffold gaps, we applied PacBio reads over 5kb in length to our Illumina assembly using  
240 PBsuite (version 14.9.9; English *et al.* 2012).

241 As an assembly quality check, BlastStation (TM Software, Inc., Arcadia, CA, U.S.A.) was used  
242 to align 654 mapped ddRAD-seq marker sequences from the F1 parent used to produce an *H. virescens*  
243 linkage map (Fritz *et al.* 2016; Dryad digital repository <http://dx.doi.org/10.5061/dryad.567v8>) to our  
244 scaffolds. All top hits were exported and markers with alignment hit lengths greater than 150bp (of 350  
245 bp total), identities greater than 80%, and e-values below 0.001 were further examined. This enabled  
246 us to check for potential misassemblies, and provide additional information about which short scaffolds  
247 likely belong together on individual chromosomes (Supplementary Table 3). BlastStation was also  
248 used to identify the scaffold to which the alpha-subunit of the *Vgsc* (GenBank Accession: AH006308.2)  
249 aligned.

250

### 251 *Structural annotation*

252 The Just\_Annotate\_My\_Genome (JAMg; <https://github.com/genomecuration/JAMg>) platform  
253 was used to generate putative gene models. First, the genome was masked using RepeatMasker (Smit

254 *et al.* 2013) and RepeatModeler (Smit *et al.* 2013). Subsequently, RNA-Seq data was obtained from  
255 NCBI for *H. subflexa* and *H. virescens* (SRA accessions: ERR738599, ERR738600, ERR738601,  
256 ERR738602, ERR738603, ERR738604, ERR738605, SRR1021613), preprocessed using  
257 “justpreprocessmyreads” (<http://justpreprocessmyreads.sourceforge.net>), and assembled with Trinity  
258 RNA-Seq 2.1.1 (Haas *et al.* 2013) using both the ‘*de-novo*’ and ‘genome-guided’ options as  
259 implemented in JAMg. The platform made use of multiple lines of evidence to support each gene  
260 model: the two Trinity RNA-Seq assemblies integrated with 63,504 publicly available Sanger-  
261 sequenced Expressed Sequence Tags using our new version of PASA (Haas *et al.* 2003); protein  
262 domain annotation of putative exons via HHblits (Remmert *et al.* 2012); the *de-novo* gene predictors  
263 GeneMark.HMM-ET (Lomsadze *et al.* 2014) and Augustus (Stanke *et al.* 2006) using the assembled  
264 and raw RNA-seq and protein domain data as external evidence. These evidence tracks were condensed  
265 to an Official Gene Set (OGS) using Evidence Modeler (Haas *et al.* 2008). A quantitative assessment  
266 of our assembly and annotation completeness was conducted using BUSCO software using the  
267 metazoan lineage setting (version 2.0.1; Simao *et al.* 2015).

268

#### 269 *H. virescens ddRAD-seq library preparation*

270 DdRAD-seq libraries were prepared according to Fritz *et al.* (2016) with minor modifications.  
271 Briefly, 200 ng of genomic DNA from the thorax of each field-collected specimen was digested with  
272 EcoRI and MspI. Overhang sites from each specimen were ligated to Truseq Universal adapters  
273 (Illumina, Inc. San Diego, CA) modified to contain a unique barcode (Elshire *et al.* 2011, Fritz *et al.*  
274 2016). Adapter-ligated DNA fragments from each individual were combined into pools of no more  
275 than 24 individuals. A Blue Pippin (Sage Science, Inc., Beverly, MA) was used to select adapter-  
276 ligated DNA fragments ranging from 450-650 bp from each pool, and size-selected DNA pools were

277 amplified in a Peltier PTC200 thermalcycler under the following reaction conditions: 72 °C for 5min,  
278 18 cycles of 98 °C for 30 sec, 65 °C for 20 sec, 72 °C for 30 sec, followed by 72 °C for 5 min. For  
279 each pool, 1 of 4 Illumina indices (1,2,6, or 12) was added via PCR to the MspI adapter. Amplified  
280 pools were combined, cleaned with a Qiaquick PCR Purification Kit (Qiagen, Inc., Valencia, CA,  
281 U.S.A.), and diluted to 4nM prior to sequencing. Prepared genomic DNA libraries constructed from a  
282 total of 177 *H. virescens* individuals were spread across four 2x300 paired-end Illumina MiSeq runs.  
283 Individuals from each year and collection location were spread evenly across each MiSeq run to  
284 minimize sequencing run bias in our downstream analysis.

285

#### 286 *Demultiplexing and Genome Alignment of DdRAD-seq Markers*

287 Illumina-generated read 1 and 2 files were merged using FLASH version 1.2.7 (Magoc and  
288 Salzberg 2011), then demultiplexed and filtered for quality using the process\_radtags script from  
289 Stacks version 1.09 (Catchen *et al.* 2011, 2013). Quality filtering entailed removal of reads when: 1)  
290 they did not have an intact EcoRI cut site, 2) had a quality score < 30, or 3) were smaller than 350 bp.  
291 We disabled the rescue reads feature in the process\_radtag script, and therefore no read containing  
292 errors in the barcode sequence was used for downstream analysis. All remaining merged reads were  
293 truncated to a maximum length of 350 bp. Filtered demultiplexed reads were aligned to our *H.*  
294 *virescens* genome assembly using Bowtie 2 (version 2.2.4; Langmead and Salzberg 2012). All reads  
295 were aligned in end-to-end mode using the preset parameters with the highest sensitivity (--very-  
296 sensitive).

297

#### 298 *Association of DdRAD-seq Marker Genotypes with the Pyrethroid Resistance Allele*

299 We first identified whether any raw ddRAD sequencing reads aligned to the scaffold containing

300 the *Vgsc* using Integrative Genomic Viewer (IGV; Robinson *et al.* 2011). Following identification of  
301 potential ddRAD-seq markers near the *Vgsc*, we inspected stacks of ddRAD-seq reads for individuals  
302 with genotypic data at the pyrethroid resistance locus. Particular attention was paid to individuals that  
303 were homozygous for the pyrethroid resistance allele. Through an IGV visual inspection of ddRAD-  
304 seq raw reads, we identified one 350bp ddRAD-seq locus (hereafter Hv\_11322), for which a single  
305 350bp sequence (hereafter Hv\_11322\_hap1) was commonly associated with the L1029H mutation at  
306 the *Vgsc*. Filtered, genome-aligned reads from all specimens were then fed into the Stacks v. 1.09  
307 (Catchen *et al.* 2011, 2013) pipeline for read clustering. Custom R and python scripts were used to call  
308 350bp ddRAD-seq genotypes at Hv\_11322 for all field-collected individuals, which were then  
309 manually inspected and edited to include any insertions and deletions that were omitted by the Stacks  
310 software. For purposes of genotype calling at Hv\_11322, individuals with a read count of 6 or higher  
311 for a single 350bp sequence were considered homozygotes, with two copies of that allele. Where  
312 individuals carried fewer than 6 reads for a single 350bp sequence, their genotypes were scored as a  
313 single copy of that observed allele plus one null allele. This threshold was chosen because individuals  
314 with 6 or more reads can be called homozygotes with greater than 95% certainty (Buerkle and Gompert  
315 2013).

316 We postulated that if the breadth of the “selective sweep” surrounding the *Vgsc* resistance allele  
317 included Hv\_11322, such that Hv\_11322\_hap1 was associated with the L1029H mutation, the rates of  
318 their decline in frequency should be similar, if indeed there was a decline. We therefore examined  
319 whether the frequencies of the L1029H mutation and Hv\_11322\_hap1 differed in their rate of decline  
320 over time. Specifically, we used a series of nested generalized linear models with binomial error  
321 structures to examine whether locus and collection year interacted to influence individual allele (*i*). In  
322 the case of the Hv\_11322 response, Hv\_11322\_hap1 was scored as a 1 and all other alleles were scored

323 as a zero. Our full statistical model was as follows:

$$324 \quad \Pr(y_i = 1) = \text{logit}^{-1}(\beta_{0i} + \beta_1 \text{Year}_i + \beta_2 \text{Locus}_i + \beta_3 \text{Year} \times \text{Locus}_i),$$

325  $\text{for } i = 1, \dots, n$

326 where Year represented the years during which the moths were collected and Locus indicated either the  
327 *Vgsc* or ddRAD-seq marker Hv\_11322. As before, we identified a model term as statistically  
328 significant when a comparison of nested models by analysis of deviance indicated that removal of that  
329 term significantly influenced model deviance. No significant difference between a model with and  
330 without the interaction term indicated that the slope of the decline in the L1029H mutation was similar  
331 to that of Hv\_11322\_hap1.

332 We also analyzed the distribution of Hv\_11322\_hap1 for groups of individuals that were  
333 homozygous for either the resistant or susceptible alleles at the *Vgsc*. In total, 32 individuals were  
334 homozygous in our target region of the *Vgsc* and contained sufficient ddRAD-seq data at nearby locus  
335 Hv\_11322 to call at least one allele. Of these 32 individuals, two Hv\_11322 alleles could be called for  
336 26 individuals, whereas only a single allele could be confidently called for 6 of the individuals due to  
337 their lower than 6X depth of coverage. In total, 58 haplotypes (from 32 individuals), which contained  
338 genotypic information for both the *Vgsc* and the nearby ddRAD-seq marker were examined. A Fisher's  
339 exact test of independence was used to determine whether there was an association between the  
340 frequencies of Hv\_11322\_hap1 and the L1029H mutation.

341

342 *H. virescens* ddRAD-seq Enabled Genome Scan

343 Previous work by Groot *et al.* showed that genetic differentiation among North American  
344 populations of *H. virescens* was low (Groot *et al.* 2008). Given these already documented high levels  
345 of gene flow between collection sites, and our goal to detect genomic change over time, we specifically

346 focused on analyzing allele frequency changes between years. Samtools (version 0.1.18; Li *et al.*  
347 2009, Li 2011) view was used to convert SAM files output by Bowtie 2 to BAM files, and SNPs were  
348 called using mpileup. BCFtools was used to generate SNP and indel genotypes, as well as genotype  
349 likelihoods in a Variant Call Formatted (VCF) file. This VCF file was filtered by VCFtools (version  
350 0.1.15, Danacek *et al.* 2011, <https://vcftools.github.io>) prior to downstream population genomic  
351 analysis. The filtered dataset included loci that: 1) were sequenced to a depth of 3 or more reads, 2)  
352 had a minor allele frequency of 0.1 or greater, 3) were represented in at least 50% of individuals, and 4)  
353 included only SNP variant sites (indels were excluded). The number of SNPs was thinned such that no  
354 more than 2 were examined per ddRAD-seq locus. This thinned SNP dataset was transformed from  
355 VCF format to genepop format using PGDSpider (version 2.1.1.0, Lischer and Excoffier 2012).  
356 Pairwise SNP outlier analyses of these thinned SNP datasets were made using Lositan (Antao *et al.*  
357 2008) with the following parameter settings: 1) “neutral” and “forced” mean  $F_{ST}$  settings were  
358 engaged, 2) the Infinite Alleles model was assumed, 3) the false discovery rate was set to 0.1, and 4)  
359 the type I error was set to 0.01.

360 Scaffolds containing SNP markers with statistically significant pairwise-genetic divergence  
361 were identified for further analysis (Supplementary Data File 2). Using the physical distance between  
362 the ddRAD-seq locus Hv\_11322 and the *Vgsc* as our guide, the predicted structural genes on each  
363 scaffold identified in our Supplementary Data File 2 and found within 36 kb of each SNP outlier were  
364 examined. Protein sequences corresponding to each annotation along a scaffold where divergent  
365 markers were present were aligned to the NCBI Arthropod database (taxid: 6656) via blastp using  
366 Blast2GO software. Gene ontology (GO) assignments for each predicted gene sequence within 36 kb  
367 of an outlier locus are also provided in Supplementary Data File 3.

368 Given the large number of outlier loci (Figure 3), and that the potential traits under selection in



369 this agricultural system (e.g. metabolic detoxification of insecticides and/or host plant defensive  
370 compounds, host volatile detection) are often quantitative, we reasoned that certain gene families may  
371 be over-represented near our outliers with respect to their overall distribution throughout the *H.*  
372 *virescens* genome. Therefore, we examined the distribution of GO categorizations (54 level two  
373 categorizations in each of three GO domains: “Biological Process”, “Molecular Function”, and  
374 “Cellular Component”) for the subset of predicted genes found near outlying SNPs for each by-year  
375 comparison. We compared those distributions to the numbers of genes found in each of these same  
376 categories in the overall *H. virescens* genome using a series of Fisher's Exact tests. Due to the large  
377 number of comparisons ( $n = 54$ ), we used a Bonferroni-corrected alpha value of 0.0009 to establish  
378 statistically significant over-representation in any one GO category. For each by-year comparison, we  
379 examined the subsets of genes within 2 different intervals from SNP outliers: 10 kb (“moderate”  
380 linkage according to Lowry *et al.* 2017) and 36 kb (extended linkage, based upon the distance between  
381 Hv\_11322 and the *Vgsc* target of selection).

382

### 383 *Strength of Selection on Outlier Loci*

384 Finally, we examined what the strength of selection must have been to produce the observed  
385 allele frequency changes at all identified outlier loci for each by-year comparison. We calculated the  
386 coefficient of selection ( $s$ ) against  $q$ , the declining allele frequency, assuming either dominance of  $p$  or  
387 co-dominance of  $p$  and  $q$  according to Falconer and Mackay (1996). Custom scripts written in R were  
388 used to calculate  $s$  for all outliers with the exception of those with initial values of  $p$  that were very low  
389 ( $p > 0.05$ ). These were excluded because they are most susceptible to under-sampling due to our small  
390 sample sizes, and small biases in these values have the potential to significantly influence the selection  
391 coefficient.

392

## 393 **Results**

### 394 *H. virescens Candidate Gene Analysis*

395           In 1997, the frequency of the L1029H mutation was 0.66 in LA and 0.63 in TX. By the year  
396 2012, the frequency of this resistance allele declined to 0.44 in LA and 0.36 in TX (Figure 1). This  
397 decline in the resistance allele frequency over our 15 year sampling period was statistically significant  
398 ( $p < 0.001$ ). Neither the interaction between year and season ( $p = 0.36$ ), season itself ( $p = 0.21$ ), nor  
399 sampling location ( $p = 0.25$ ) significantly influenced the frequency of the resistance allele.

400

### 401 *Strength of Selection against the Vgsc Resistance Allele*

402           In LA, the frequency of the resistance allele declined by 0.22 over the 15 years between 1997  
403 and 2012. In TX, the decline in the resistance allele frequency was 0.27. Therefore, the increase in  $p$   
404 per generation was 0.004 and 0.005 for LA and TX, respectively. With this information, we were able  
405 to calculate a selection coefficient of 0.03 for each of the LA and TX populations.

406

### 407 *Genome Sequencing and Assembly*

408           In total, the Illumina sequencing runs produced 122,433,923 and 232,607,659 reads for PE and  
409 MP libraries, respectively. After read trimming and filtering, 115,374,414 and 227,857,423 reads from  
410 the PE and MP libraries were used for assembly. An additional 482,464 PacBio reads with an average  
411 length of 7560 (s.d. = 2663) bp were applied to our Illumina assembly using PBSuite software for gap  
412 filling. The final *H. virescens* genome assembly was comprised of 8,826 scaffolds with a total length  
413 of 403,154,421 bp, similar to the previously estimated *H. virescens* genome size of 401 Mbp (Gregory  
414 and Herbert 2003). The scaffold N50 was 102,214 bp (mean size = 45,678 bp; range = 659 – 628,964

415 bp). A BUSCO analysis of our final assembly indicated that 865 (88%) of the 978 core conserved  
416 eukaryotic genes were complete. Further specifications for our genome assembly can be found in  
417 Supplementary Table 4. When we examined our previously mapped *H. virescens* ddRAD-seq markers  
418 (Fritz *et al.* 2016), a total of 562 out of 654 met the aforementioned alignment criteria relative to the  
419 reference genome and were used to examine and group scaffolds into chromosomes. Of these 562  
420 markers, 557 aligned uniquely to a single scaffold, while 5 markers (4851, 5891, 13906, 22644, 29612)  
421 aligned well to multiple scaffolds. This suggested that either those scaffolds were allelic, or that the  
422 marker sequences contain repetitive DNA. Four-hundred eighty three of the 8826 scaffolds present in  
423 our assembly were aligned to at least 1 mapped marker. In most cases (n = 421 scaffolds), a single  
424 scaffold was associated with a single mapped marker. However, 62 scaffolds could be aligned to  
425 multiple mapped markers, which enabled us to check the quality of our assembly against our linkage  
426 map. Of these 62 scaffolds, only 5% (3 scaffolds) aligned to markers that originally mapped to  
427 different linkage groups. A summary of the scaffold names and groupings by linkage group can be  
428 found in Supplementary Table 3. One scaffold, numbered 4600, contained the entire *Vgsc* sequence  
429 available from GenBank accession AH006308.2.

#### 430 431 *Association of DdRAD-seq Marker Genotypes with the Pyrethroid Resistance Allele*

432 We located one ddRAD-seq marker, called Hv\_11322, spanning bp 11,397 through 11,747 of  
433 Scaffold 4600 which is *ca.* 37 kb upstream from the pyrethroid resistance locus. In total, 55 unique  
434 Hv\_11322 sequences (alleles) could be identified from 138 individuals using Stacks. Fifty of these 55  
435 alleles were found fewer than three times in our field-collected populations. The remaining five most  
436 common alleles (Supplementary Figure 4) were found 5, 5, 6, 12, and 161 times, respectively.  
437 According to an NCBI blast, all of these sequences aligned well with an *Helicoverpa armigera*

438 sequence (GenBank accession DQ458470.1) that also contained the *Vgsc*.

439 No statistically significant difference existed between the slope of the decline in the L1029H  
440 mutation and Hv\_11322\_hap1 (deviance = -0.355, df = 1, p = 0.551). These allele frequency declines  
441 are plotted in Figure 1. When we examined the full haplotypes (e.g. containing both the Hv\_11322  
442 locus and the pyrethroid resistance locus), specifically in homozygotes at the pyrethroid resistance  
443 locus, we identified 20 unique Hv\_11322 alleles in the 32 total individuals (or N = 58 chromosomes).  
444 When chromosomes containing the L1029H mutation (pyrethroid resistance-conferring *Vgsc* allele)  
445 were examined, 85% (29 of 34) also carried the ddRAD-seq allele Hv\_11322\_hap1 (Figure 2). The  
446 remaining 5 chromosomes bearing the L1029H mutation contained 4 unique Hv\_11322 alleles, none of  
447 which were the 5 most common Hv\_11322 alleles. Only 5% (1 of 24) of the chromosomes bearing the  
448 wild-type *Vgsc* allele also carried Hv\_11322\_hap1. Fifteen unique Hv\_11322 alleles of the 20 alleles  
449 found in homozygotes were associated with the wild-type *Vgsc* allele. A Fisher's Exact test indicated  
450 that there was a statistically significant association between the presence of Hv\_11322\_hap1 and the  
451 L1029H mutation (p < 0.001).

452

453 *H. virescens* ddRAD-seq Enabled Genome Scan

454 Of the 1,682,114 SNPs in our ddRAD-seq marker dataset, the total number of filtered SNPs  
455 included in the analyzed dataset was 8,963. Based upon this filtered dataset, overall population  
456 genomic divergence between years was low. Pairwise Weir and Cockerham's overall FST values were  
457 0.005, 0.004, and 0.013 for the comparisons 1997-2007, 1997-2012, and 2007-2012, respectively.

458 We first examined SNPs along Scaffold 4600, where the *Vgsc* was located, for evidence of  
459 genomic divergence between years. Between the years 1997 and 2012, one SNP at position 11706 on  
460 Scaffold 4600, which was part of Hv\_11322, showed signs of statistically significant genetic

461 divergence with a Weir and Cockerham's  $F_{ST}$  value of 0.205 ( $p < 0.001$ ). This SNP, a cytosine to  
462 thymine transition, went from a cytosine allele frequency of 0.875 ( $n = 44$  diploid individuals) in 1997,  
463 fell to a frequency of 0.724 in 2007 ( $n = 49$ ) and further declined to a frequency of 0.548 in 2012 ( $n =$   
464 52; Fig. 1).

465 In addition to this  $F_{ST}$  outlier on Scaffold 4600, our genome scan revealed a number of  
466 additional diverging allele frequencies for each by-year comparison. In total, we detected a total of 351  
467 SNPs on 314 scaffolds (3.6% of the 8,826 total scaffolds) as outliers in at least one by-year  
468 comparison. Table 1 shows the number of genomic outliers for each comparison, as well as the number  
469 of unique scaffolds on which these unique outliers were found. Between the years 1997 and 2007, 201  
470 SNPs (2.2% of the 8,963 total SNPs examined) showed signs of significant allele frequency  
471 divergence, whereas only 35 SNPs (0.4% of the 8,963 total SNPs) significantly diverged between the  
472 years 2007 and 2012. When a comparison was made over the total time period, between the years 1997  
473 and 2012, 184 SNPs showed signs of statistically significant allelic divergence.

474 In some cases, the same SNPs showed signs of divergence in two different by-year  
475 comparisons, but no SNP outliers were shared among all 3 comparisons (Supplementary Figure 5).  
476 Fifty-three SNPs were considered outliers between the years 1997 and 2007, and again between 1997  
477 and 2012. This indicated that significant allele frequency changes occurred between the years 1997  
478 and 2007, followed by stability or small, non-significant allele frequency changes through the year  
479 2012. Likewise, 5 SNPs showed significant allele frequency divergence between the years 1997 and  
480 2012, and again between the years 2007 and 2012, indicating that allele frequencies were stable, or  
481 underwent modest changes between the years 1997 and 2007 followed by a significant change in the  
482 year 2012.

483 When we examined the 36 kb of DNA flanking the SNP outliers on these 314 scaffolds (72 kb

484 total), the mean number of putative genes identified in these broader genomic regions was fewer than 3,  
485 and the maximum was 12 (see Table 1 for a complete breakdown by comparison). A complete list of  
486 outlier SNPs and their genome positions for each by-year comparison, as well as the putative genes and  
487 their GO assignments within the 36 kb window surrounding these SNPs can be found in Supplementary  
488 Data files 2 and 3, respectively.

489         Some outliers were found near putative genes with functions related to either insecticide  
490 resistance or changes in host use. For example, one predicted gene sequence within 10kb of two  
491 outliers, JAMg\_model\_7841, aligned to a cytochrome p450 protein sequence (*Cyp6AE12*) from  
492 *Helicoverpa armigera* (GenBank Accession AID54888.1) with a 100% query cover and 83% identity.  
493 It was identified on Scaffold 3424 and the associated SNPs were detected as outliers between 1997 and  
494 2012, and also between 2007 and 2012. As a second example, two predicted gene sequences,  
495 JAMg\_model\_4652 and JAMg\_model\_4653 aligned with at least 70% query cover and 78% identity to  
496 *Athetis lepigone* olfactory receptor (OR60; GenBank Accession KT588155.1) and *Helicoverpa assulta*  
497 olfactory receptor (OR33; GenBank Accession KJ542684.1) sequences, respectively. These gene  
498 sequences were found within 10kb of a SNP outlier from 1997-2007 and 1997-2012 comparisons and  
499 was located on Scaffold 2173. We examined the ontology of genes near SNP outliers, with an eye  
500 toward those predicted to be important for detoxification and behavior, to identify whether any GO  
501 category was over-represented near outlier SNPs relative to the overall genome.

502         GO assignments by Blast2GO were only achieved for a subset of predicted genes. The  
503 proportions of putative genes within 36 kb of outliers for which a function could be predicted were  
504 0.37, 0.38, and 0.32 for the by-year comparisons 1997-2007, 1997-2012, and 2007-2012, respectively.  
505 While low, these were similar to the proportion of gene predictions assigned a function by Blast2GO in  
506 the overall genome assembly (0.40). When Fisher's Exact tests were applied to identify whether any

507 level 2 GO term was over-represented in either 10 or 36kb windows near outlier SNPs from each by-  
508 year comparison, no significant difference was found relative to their distribution in the overall  
509 genome.

510

### 511 *Strength of Selection on Outlier Loci*

512 Selection coefficients ( $s$ ) were calculated for 164, 150, and 31 outliers for the following by-year  
513 comparisons, respectively: 1997 and 2007, 1997 and 2012, and 2007 and 2012. For selection against  $q$ ,  
514 the declining allele,  $s$  ranged from 0.009 – 0.301 across all by-year comparisons when dominance of  $p$   
515 was assumed. When co-dominance of  $p$  and  $q$  was assumed, selection coefficients ranged from 0.012  
516 to 0.623. The mean selection coefficients ( $\pm$  standard deviation) calculated across outliers were  
517 0.047(0.020), 0.077 (0.029) and 0.165 (0.062) assuming dominance of  $p$  for the 1997 - 2012, 1997 -  
518 2007, and 2007 - 2012 by-year comparisons, respectively. Mean selection coefficients assuming  
519 codominance of  $p$  and  $q$  were 0.058 (0.037), 0.088 (0.058), and 0.200 (0.150) for these same time  
520 periods. In general, SNPs with higher selection coefficients were associated with greater rates of  
521 change in the frequency of  $q$ , as well as higher initial starting values of  $q$  (Figure 4).

522

### 523 **Discussion**

524 Double-digest RAD-seq and other NGS marker-development methods have been used to detect  
525 signatures of local adaptation in a number of non-model plant and animal species (e.g. Hohenlohe *et al.*  
526 2010, Nadeau *et al.* 2014, Pujolar *et al.* 2014, Ruegg *et al.* 2014, Pais *et al.* 2016). Here we have  
527 demonstrated the power of ddRAD-seq to identify genomic regions that have diverged over short  
528 evolutionary time scales (fewer than 2 decades) in a landscape characterized by human-induced  
529 environmental change. We postulated that widespread adoption and cultivation of Bt cotton in the

530 Southern United States would likely impose strong selection on Lepidopteran herbivore and cotton  
531 pest, *H. virescens*, through shifts in host plant composition and insecticide use. We first identified  
532 allele frequency changes at a likely gene target of selection, the *Vgsc*, in field-collected populations of  
533 *H. virescens*. We then demonstrated that this change could be detected using a nearby ddRAD-seq  
534 marker. Allele frequencies at many other regions of the *H. virescens* genome also diverged over time,  
535 likely in response to selection pressures imposed by widespread adoption of Bt cotton. We calculated  
536 selection coefficients for SNPs that were detected as having changed significantly over time, to  
537 demonstrate the strength of selection encountered by organisms found in agricultural ecosystems.  
538 Furthermore, we sequenced and assembled an *H. virescens* genome to help us identify potential  
539 structural genes involved in adaptation to agricultural inputs, and made it publicly available at NCBI.

540 Our initial examination of the *Vgsc*, a candidate gene likely to be impacted by the decline in  
541 pyrethroid use that followed Bt cotton adoption, demonstrated that the resistance-conferring L1029H  
542 mutation declined in frequency over time. Indeed, examination of allele frequency changes at the *Vgsc*  
543 locus yielded a selection coefficient of 0.03. This indicated that the resistance allele was moderately to  
544 strongly deleterious in field populations where pyrethroid pressure was low (Eyre-Walker and  
545 Keightley 2007, Kim *et al.* 2017). A selection coefficient of this magnitude seemed reasonable given  
546 the previously reported fitness cost associated with carrying this resistance allele (Zhao *et al.* 2000).  
547 We were surprised to see the frequency of the resistance allele plateau in the year 2007 and remain at  
548 *ca.* 0.4 through the year 2012, however. There are several possible explanations for this. One  
549 explanation is that pyrethroid pressure has declined but remains sufficiently high such that maintenance  
550 of the resistance allele in field populations is advantageous, in spite of the fitness cost to individuals  
551 that carry it (Zhao *et al.* 2000). Alternatively, as the resistance allele frequency declines there are  
552 relatively fewer homozygous resistant genotypes. If the fitness cost is only associated with



553 homozygotes then the decline in resistance allele frequency could level off, even in the absence of  
554 pyrethroid selection.

555         Using a ddRAD-seq dataset, we identified one marker that aligned to our reference genome 37  
556 kb upstream of the *Vgsc*. One allele of this 350bp marker, called Hv\_11322\_hap1, was associated with  
557 the L1029H mutation that confers pyrethroid resistance. This suggested that Hv\_11322\_hap1 was in  
558 linkage disequilibrium with the L1029H mutation. Furthermore, the breadth of the selective sweep in  
559 this genomic region extended at least 36 kb on one side of the *Vgsc*. Upon further examination of  
560 Scaffold 4600, which contains this region under selection, we identified three cytochrome p450s that  
561 are found between Hv\_11322 and the *Vgsc*. This confirmed previous reports of tight physical linkage  
562 between the *Vgsc* and *Cyp6B10* in *H. virescens* (Park and Brown 2002). It is possible that these  
563 cytochrome p450s could also be targets of selection by pyrethroid insecticides, and future work could  
564 be directed at whether or not they play any roles in the expression of pyrethroid resistance phenotypes.  
565 Work in another closely-related Lepidopteran species, *H. armigera*, suggests that this particular  
566 cytochrome p450 is not involved in pyrethroid resistance, however (Grubor *et al.* 2007).

567         SNP data from our ddRAD-seq marker Hv\_11322 enabled us to rediscover changes at the *Vgsc*  
568 associated with the L1029H mutation over time. While the SNP outlier in the Hv\_11322 marker  
569 demonstrated significant allelic divergence relative to the genome-wide average  $F_{ST}$  value, additional  
570 SNP outliers on other *H. virescens* scaffolds were also detected. In spite of the fact that we applied a  
571 correction to reduce detection of false positives, it is possible that up to 35 of our total 351 SNP outliers  
572 are false positives given our false discovery rate of 0.1. This correction threshold was selected to  
573 minimize false positive detection, while retaining true positives (Verhoeven *et al.* 2005). To safeguard  
574 against pursuing potential false positives, further research could initially focus on genes near outliers  
575 with significant allele frequency changes in multiple by-year comparisons. Fifty-three SNPs showed

576 significant allelic divergence across multiple by-year comparisons, where major allele frequency shifts  
577 took place between the years 1997 and 2007. Between 2007 and 2012, 5 SNPs showed significant  
578 shifts in allele frequency and these changes were detected in multiple by-year comparisons as well. It  
579 is likely that these SNP markers are in linkage disequilibrium with gene targets of selection as  
580 management of cotton ecosystems has led to the replacement of conventional cotton cultivars with Bt-  
581 expressing varieties. Interestingly, two of these SNPs were found on scaffolds containing genes with  
582 plausible roles in detoxification (of insecticides and plant defensive compounds) or host plant  
583 detection.

584 Scaffold 3424 contained SNPs that diverged significantly over time in our field-collected  
585 populations of *H. virescens*. Divergence was strongest in by-year comparisons from 1997-2007, and  
586 1997-2012. This suggests that most genomic change occurred between the years 1997 and 2007, and  
587 that allele frequencies remained stable between the years 2007 and 2012. Blast results for predicted  
588 gene sequences found on this scaffold revealed homology with the cytochrome p450 superfamily. The  
589 predicted sequence aligned well with an *H. armigera Cyp6AE* gene, which is a cytochrome p450  
590 family known to be involved in detoxification (Zhou *et al.* 2010). The best alignment was to an *H.*  
591 *armigera Cyp6AE12*, and expression levels of this gene in *H. armigera* are modified in response to  
592 pyrethroid insecticides (Yue *et al.* 2007, Zhou *et al.* 2010). It is possible that allelic changes on this  
593 scaffold are a response to reduced pyrethroid use in the Southern United States as a result of Bt cotton  
594 deployment in the agricultural landscape.

595 An alternative explanation exists for changes in allele frequencies at this candidate gene,  
596 however. *Cyp6AE12* expression is also modified in response to the plant compound xanthotoxin (Zhou  
597 *et al.* 2010). Another *Cyp6AE* monooxygenase, *Cyp6AE14*, has 68% protein sequence similarity to *H.*  
598 *armigera Cyp6AE12*, is highly expressed in the midgut of *H. armigera*, and is likely involved in

599 detoxification of the cotton defensive compound gossypol (Mao *et al.* 2007). Indeed, RNAi silencing  
600 of *Cyp6AE14* in *H. armigera* led to a decline in larval growth when gossypol was present in their diet  
601 (Mao *et al.* 2007). If this *H. virescens* cytochrome p450 is indeed the target of selection, it is possible  
602 that the divergence in allele frequencies between the years 2007 and 2012 was the result of selection for  
603 improved larval performance in *H. virescens* populations that feed on alternative hosts. When  
604 widespread planting of Bt-expressing cotton drove *H. virescens* off of their previously abundant cotton  
605 host to alternative host plants, *H. virescens* would have been exposed to new plant defensive  
606 compounds. Genes associated with larval performance in one host plant genera may or may not be  
607 associated with improved larval performance on other host plant genera (Sheck and Gould 1993).  
608 Therefore, allelic changes near our *H. virescens* SNP outlier may be caused by relaxation of selection  
609 for gossypol detoxification as they moved out of cotton, or adaptation to new host plants and their  
610 antifeedant chemicals. To determine whether phenotypes resulting from these molecular shifts are  
611 directly associated with changing *H. virescens* management practices (e.g. pyrethoid or Bt toxin use) or  
612 shifts in host plant use, further work could involve measuring associations between Bt or pyrethoid  
613 response phenotypes and genotypes at target genes on these scaffolds.

614 Equally as important to host shifts is the ability of adult females to find a suitable host for  
615 oviposition. Chemosensation is important for host plant identification in phytophagous insects, and  
616 genes involved in olfaction and gustation are often targets of selection when host shifts occur (Dworkin  
617 and Jones 2009, Smajda *et al.* 2012). An outlier SNP was detected on *H. virescens* Scaffold 2173 that  
618 underwent allele frequency changes between the years 1997 and 2007, then remained stable between  
619 the years 2007-2012. Within 10 kb of this outlier was a pair of olfactory receptor genes. It is plausible  
620 that allele frequency changes at these olfactory receptor genes may reflect changes in the olfactory  
621 percept, enabling females to identify non-cotton host plants. Future work directed at elucidating the

622 phenotypic effects of changes at these genes will be critical to determining their role, if any, in host  
623 plant detection.

624 Both toxin metabolism and chemosensation can be complex traits with multiple loci involved.  
625 Arrays of duplicated cytochrome p450s (Li *et al.* 2002, David *et al.* 2013) and carboxylesterases (Field  
626 *et al.* 1988, Guillemaud *et al.* 1997) have been implicated in metabolic detoxification of chemicals in  
627 other insect species. Likewise, clusters of olfactory and gustatory receptors are thought to contribute to  
628 host-plant utilization in some insect species (Smajda *et al.* 2012). Therefore, we examined GO level 2  
629 categorizations, particularly those related to detoxification and chemosensation, for the putative genes  
630 surrounding our SNP outliers to determine if any GO categories were over-represented near our outliers  
631 relative to the rest of the genome. Our results did not suggest there was any statistically significant  
632 over-representation of any GO category near our outliers for any of our by-year comparisons. There  
633 are at least two possible explanations for this: 1.) The targets of selection linked to our SNP outliers do  
634 not necessarily involve duplicated, amplified, or arrayed genes of similar function. Instead these  
635 targets may involve single copy genes or gene regulatory regions associated with adaptive phenotypes  
636 in *H. virescens*. 2.) Only 30-40% of the putative genes in our genome were assigned a function in our  
637 annotation pipeline. While our *H. virescens* draft assembly was instrumental to identifying selection at  
638 the *Vgsc*, as well as identifying novel genomic regions under selection in field-collected populations,  
639 there is room for improvement. Increasing the contiguity of our assembly will enable chromosome-  
640 level identification of runs of homozygosity, a hallmark of selection. Likewise, manual curation efforts  
641 will improve official gene set and the likelihood of identifying the gene targets near our SNP outliers.

642 While the gene targets of selection during these time periods require further validation, the  
643 strength of selection near these targets, as measured by  $s$ , ranged from 0.009 and 0.623, depending  
644 upon by-year comparison and degree of dominance assumed. Following theoretical expectations,

645 selection against  $q$  required higher selection coefficients when initial frequencies of  $q$  were high  
646 (Figure 4). Furthermore, degree of dominance impacted  $s$ , where values ranged from 14-23% higher  
647 when co-dominance was assumed, rather than dominance of  $p$ . Based upon theoretical expectations,  
648 the coefficient of selection against  $q$  should be greater under assumptions of a recessive  $p$  and a  
649 dominant  $q$ . Indeed, examples of selection against a dominant susceptible allele ( $q$ ), resulting in the  
650 increase in frequency of a recessive resistance allele ( $p$ ) have been described in the insecticide  
651 resistance literature (for example, see Ferré and Van Rie 2002). Across all outlier SNPs discovered  
652 within each by year comparison, 1997-2012, 1997-2007, and 2007-2002, the average selection  
653 coefficients were 0.047 and 0.058, 0.077 and 0.088, and 0.165 and 0.200, respectively, depending on  
654 degree of dominance, and these are considered to be moderate to high values of  $s$  according to Eyre-  
655 Walker and Keightley (2007), and Kim *et al.* (2017). Ultimately, these values of  $s$  demonstrate the  
656 strong selection imposed on species found in agricultural ecosystems.

657         In conclusion, we demonstrated that ddRAD-seq enabled genomic scanning can be used to  
658 identify organismal responses to anthropogenic changes in agricultural ecosystems, even on short, 15  
659 year time scales. We then identified additional genomic regions in this Lepidopteran species that are  
660 likely changing in response to shifts from conventional cotton planting to widespread Bt-cotton  
661 adoption. From an applied perspective, our results suggest that ddRAD-seq genome scans may be  
662 useful for monitoring pest populations for real-time changes in allele frequencies at loci responding to  
663 the very strong selection imposed by insect management practices. We conclude that this technology  
664 could be useful for identifying strong selection for resistance alleles, and then acting to mitigate  
665 widespread phenotypic resistance to management practices across plant and insect species in  
666 agricultural ecosystems.

667 **Data Availability**

668 Scripts and configuration files used for genome assembly can be found at:

669 [https://github.com/mcadamme/Hv\\_Genome\\_Assembly\\_Draft1](https://github.com/mcadamme/Hv_Genome_Assembly_Draft1)

670

671 Scripts used for population genomic analysis can be found at:

672 [https://github.com/mcadamme/FieldHv\\_Pop\\_Genomics](https://github.com/mcadamme/FieldHv_Pop_Genomics)

673

674 Raw sequence ddRAD-seq data have been deposited in the NCBI SRA as: (updated following

675 acceptance of the manuscript)

676

677 Our *H. virescens* draft 1 assembly and associated read sequences have been deposited in the NCBI

678 database under BioProject number PRJNA379496.

679

680 **Acknowledgements**

681 Thanks to Dr. J. Schaff and Dr. D. Baltzegar of the North Carolina State University Genomic Sciences

682 Lab for their insightful suggestions on ways to improve our methods. We also thank Dr. Keith Hopper

683 for early discussions of our genome assembly. Gabrielle Beaudry, Emma Thompson, Kelsey

684 Mckinney, Wilfred Wong, Sharyar Samir, and Xuechun Wang isolated gDNA from the moths used in

685 this project. Nico Olegario assisted with the L1029H genotyping. Mr. S. Micinski, Dr. J. Lopez, and

686 Dr. J. Westbrook collected the moths used in this project. R. Waples wrote one of the custom scripts

687 used in our data pipeline. This project was supported by the Biotechnology Risk Assessment Program

688 competitive grant number 2012-33522-19793 from the USDA - National Institute of Food and

689 Agriculture.

690 **References**

- 691 Andrews KR, Good JM, Miller MR, Luikart G, Hohenlohe PA (2016) Harnessing the power of  
692 RADseq for ecological and evolutionary genomics. *Nature Reviews Genetics*, **17**, 81-92.  
693
- 694 Antao T, Lopes A, Lopes RJ, Beja-Pereira A, Luikart G (2008) LOSITAN: a workbench to detect  
695 molecular adaptation based on a Fst-outlier method. *BMC Bioinformatics* 28(9): 328.  
696
- 697 Bachelier, J (1999) Pyrethroids no longer recommended for second generation tobacco budworms.  
698 *Carolina Cotton Notes*, <http://www.cotton.ncsu.edu/ccn/1999/ccn-99-5f.htm>  
699
- 700 Baird NA, Etter PD, Atwood TS, Currey MC, Shiver AL, Lewis ZA, Selker EU, Cresko WA, Johnson  
701 EA (2008) Rapid SNP discovery and genetic mapping using sequenced RAD markers. *PloS One*, **3**,  
702 e3376.  
703
- 704 Barber GW (1937) Seasonal availability of food plants of two species of *Heliothis* in eastern Georgia.  
705 *Journal of Economic Entomology*, **30**, 150-158.  
706
- 707 BBMap - Bushnell B. - [sourceforge.net/projects/bbmap/](http://sourceforge.net/projects/bbmap/)  
708
- 709 Benbrook CM (2012) Impacts of genetically engineered crops on pesticide use in the U.S. – the first  
710 sixteen years. *Environmental Sciences Europe*, **24**, 24.  
711
- 712 Blanco CA (2012) *Heliothis virescens* and Bt cotton in the United States. *GM Crops & Food:  
713 Biotechnology in Agriculture and the Food Chain*, **3**, 201-212.  
714
- 715 Bolger, A. M., Lohse, M., and Usadel, B (2014) Trimmomatic: A flexible trimmer for Illumina  
716 Sequence Data. *Bioinformatics*, btu170.  
717
- 718 Brito LP, Linss JGB, Lima-Camara TN, Belinato TA, Peixoto AA, Lima JBP, Valle D, Martins AJ  
719 (2013) Assessing the effects of *Aedes aegypti* kdr mutations on pyrethroid resistance and its fitness  
720 cost. *PloS ONE*, **8**, e60878.  
721
- 722 Buerkle CA and Gompert Z (2013) Population genomics based on low coverage sequencing: how low  
723 should we go? *Molecular Ecology* **22**, 3028-3035.  
724
- 725 Campanhola C and Plapp FW (1989) Pyrethroid resistance in the tobacco budworm (Lepidoptera:  
726 Noctuidae): insecticide bioassays and field monitoring. *J Econ Entomol*, **82**, 22-28.  
727
- 728 Catchen J, Amores A, Hohenlohe P, Cresko W, Postlethwait J, De Koning, D (2011) Stacks: Building  
729 and Genotyping Loci De Novo From Short-Read Sequences. *G3: Genes Genomes Genetics*, **1**, 171-  
730 182.  
731

- 732 Catchen J, Hohenlohe P, Bassham S, Amores A, and Cresko W (2013) Stacks: an analysis tool set for  
733 population genomics. *Molecular Ecology*, **22**, 3124-3140.
- 734
- 735 Catchen JM, Hohenlohe PA, Bernatchez L, Funk WC, Andrews KR, Allendorf FW (2017) Unbroken:  
736 RADseq remains a powerful tool for understanding the genetics of adaptation in natural populations.  
737 *Mol Ecol Res* doi:10.1111/1755-0998.12669
- 738
- 739 Charlesworth B, Charlesworth D (2010) *Elements of Evolutionary Genetics*. Roberts and Company  
740 Publishers, Greenwood Village, Colorado, USA.
- 741
- 742 David J, Ismail H, Chandor-Proust A, Paine MJI (2013) Role of cytochrome P450s in insecticide  
743 resistance: impact on the control of mosquito-borne diseases and use of insecticides on Earth. *Philos*  
744 *Trans R Soc London B Biol Sci*, **368(1612)**, 20120429.
- 745
- 746 Dworkin I, and Jones CD (2009) Genetic changes accompanying the evolution of host specialization in  
747 *Drosophila sechellia*. *Genetics* **181(2)**, 721-736.
- 748
- 749 Elshire RJ, Glaubitz JC, Sun Q, Poland JA, Kawamoto K., Buckler ES, Mitchell SE (2011) A robust,  
750 simple genotyping-by-sequencing (GBS) approach for high diversity species. *PLoS ONE*, **6**, e19379.
- 751
- 752 English AC, Richards S, Han Y, Wang M, Vee V, Qu J, Qin X, Muzny DM, Reid JG, Worley KC, Gibbs  
753 RA (2012) Mind the gap: upgrading genomes with Pacific Biosciences RS long-read sequencing  
754 technology. *PLoS One*, **7**, e47768.
- 755
- 756 Eyre-Walker A, Keightley PD (2007) The distribution of fitness effects of new mutations. *Nature*  
757 *Reviews Genetics*, **8**, 610-618.
- 758
- 759 Falconer DS and Mackay TFC (1996) *Introduction to Quantitative Genetics*, 4<sup>th</sup> ed. Addison Wesley  
760 Longman Limited. Essex, England.
- 761
- 762 Ferré F and Van Rie J (2002) Biochemistry and genetics of insect resistance to *Bacillus thuringiensis*.  
763 *Ann Rev Entomol*, **47**, 501-533.
- 764
- 765 Field LM, Devonshire AL, Forde BG (1988) Molecular evidence that insecticide resistance in peach-  
766 potato aphids (*Myzus persicae* Sulz.) results from amplification of an esterase gene. *Biochem J* **251**,  
767 309-321.
- 768
- 769 Fitt GP (1989) The ecology of *Heliothis* species in relation to agroecosystems. *Ann. Rev. Entomol.* **34**,  
770 17-52.
- 771
- 772 Foster SP, Denholm I, Thompson R, Poppy GM, Powell W (2005) Reduced response of insecticide-  
773 resistant aphids and attraction of parasitoids to aphid alarm pheromone; a potential fitness trade-off.



- 774 *Bulletin of Entomological Research*, **95**, 37–46.  
775
- 776 Fritz ML, Paa S, Baltzegar J, Gould F (2016) Application of a dense genetic map for assessment of  
777 genomic responses to selection and inbreeding in *Heliothis virescens*. *Insect Molecular Biology*, **25(4)**,  
778 385-400.  
779
- 780 Gould F, Anderson A, Reynolds A, Bumgarner L, Moar W (1995) Selection and genetic  
781 analysis of a *Heliothis virescens* (Lepidoptera: Noctuidae) strain with high levels of resistance to  
782 *Bacillus thuringiensis* toxins. *Journal of Economic Entomology*, **88**, 1545-1559.  
783
- 784 Gregory TR, Hebert PD (2003) Genome size variation in lepidopteran insects. *Canadian Journal of*  
785 *Zoology*, **81**, 1399-1405.  
786
- 787 Groot AT, Classen A, Inglis O, Blanco CA, Lopez J, Teran Vargas A, Schal C, Heckel DG, Schofl G  
788 (2011) Genetic differentiation across North America in the generalist moth *Heliothis virescens* and the  
789 specialist *H. subflexa*. *Molecular Ecology* **20 (13)**, 2676-2692.  
790
- 791 Grubor VD, Heckel DG (2007) Evaluation of the role of CYP6B cytochrome p450s in pyrethroid  
792 resistance in Australian *Helicoverpa armigera*. *Insect Mol Biol*, **16**, 15-23.  
793
- 794 Guillemaud T, Makate N, Raymond M, Hirst B, Callaghan A (1997) Esterase gene amplification in  
795 *Culex pipiens*. *Insect Molecular Biology*, **6**, 319-327.  
796
- 797 Haas BJ, Papanicolaou A, Yassour M, Grabherr M, Blood P D, Bowden J, Regev A (2013) De novo  
798 transcript sequence reconstruction from RNA-seq using the Trinity platform for reference generation  
799 and analysis. *Nature Protocols*, **8**, 1494–1512.  
800
- 801 Haas BJ, Salzberg SL, Zhu W, Pertea M, Allen JE, Orvis J, Wortman JR (2008) Automated eukaryotic  
802 gene structure annotation using EVIDENCEModeler and the Program to Assemble Spliced Alignments.  
803 *Genome Biology*, **9**, R7.  
804
- 805 Haas BJ, Delcher AL, Mount SM, Wortman JR, Smith RK, Hannick LI, White O (2003) Improving the  
806 Arabidopsis genome annotation using maximal transcript alignment assemblies. *Nucleic Acids*  
807 *Research*, **31**, 5654–5666.  
808
- 809 Heckel DG, Gahan LJ, Baxter SW, Zhao J, Shelton AM, Gould F, Tabashnik BE (2007) The diversity  
810 of Bt resistance genes in species of Lepidoptera. *Journal of Invertebrate Pathology*, **95**, 192-197.  
811
- 812 Hohenlohe PA, Bassham S, Etter PD, Stiffler N, Johnson EA, Cresko WA (2010) Population genomics  
813 of parallel adaptation in threespine stickleback using sequenced RAD tags. *PLoS Genet*, **6**, e1000862.  
814
- 815 Huang S, Chen Z, Huang G, Yu T, Yang P, Li J, Fu Y, Yuan S, Chen S, Xu A (2012) HaploMerger:

- 816 reconstructing allelic relationships for polymorphic diploid genome assemblies. *Genome Res*, **22**, 1581-  
817 1588.
- 818
- 819 Jallow MFA, Zalucki MP (1996) Within- and between-population variation in host-plant preference and  
820 specificity in Australian *Helicoverpa armigera* (Hubner)(Lepidoptera: Noctuidae). *Aust. J. Zool.*, **44**,  
821 503-519.
- 822
- 823 Jallow MFA, Cunningham JP, Zalucki MP (2004) Intra-specific variation for host plant use in  
824 *Helicoverpa armigera* (Hubner) (Lepidoptera: Noctuidae): implications for management. *Crop*  
825 *Protection*, **23**, 955-964.
- 826
- 827 James, C (2015) 20th Anniversary (1996 to 2015) of the Global Commercialization of Biotech Crops  
828 and Biotech Crop Highlights in 2015. *ISAAA Brief* No. 51. ISAAA: Ithaca, NY.
- 829
- 830 Jurka J, Kapitonov VV, Pavlicek A, Klonowski P, Kohany O, Walichiewicz J (2005) Repbase Update, a  
831 database of eukaryotic repetitive elements. *Cytogenetic and Genome Research* 110:462-467
- 832
- 833 Karpinski A, Haenniger S, Schofl G, Heckel DG, Groot AT (2014) Host plant specialization in the  
834 generalist moth *Heliothis virescens* and the role of egg imprinting. *Evol Ecol.*, **28**, 1075-1093.
- 835
- 836 Kim BY, Huber CD, Lohmueller KE (2017) Inference of the distribution of selection coefficients for  
837 new nonsynonymous mutations using large samples. *Genetics*, **206** (1), 345-361.
- 838
- 839 Kliot A, Ghanim M (2012) Fitness costs associated with insecticide resistance. *Pest. Manag. Sci.*, **68**,  
840 1431–1437.
- 841
- 842 Langmead B, Salzberg S (2012) Fast gapped-read alignment with Bowtie 2. *Nature Methods*, **9**, 357-  
843 359.
- 844
- 845 Li X, Berenbaum MR, Schuler MA (2002) Plant allelochemicals differentially regulate *Helicoverpa*  
846 *zea* cytochrome P450 genes. *Insect Molecular Biology*, **11**(4): 343-351.
- 847
- 848 Li H, Handsaker B, Wysoker A, Fennell T, Ruan J, Homer N, Marth G, Abecasis G, Durbin R, 1000  
849 Genome Project Data Processing Subgroup (2009) The Sequence alignment/map (SAM) format and  
850 SAMtools. *Bioinformatics*, **25**, 2078-2079.
- 851
- 852 Li H (2011) A statistical framework for SNP calling, mutation discovery, association mapping and  
853 population genetical parameter estimation from sequencing data. *Bioinformatics*, **27**, 2987-2993.
- 854
- 855 Lischer HEL and Excoffier L (2012) PGDSpider: An automated data conversion tool for connecting  
856 population genetics and genomics programs. *Bioinformatics* **28**: 298-299.
- 857

- 858 Lomsadze A, Burns PD, Borodovsky M (2014) Integration of mapped RNA-Seq reads into automatic  
859 training of eukaryotic gene finding algorithm. *Nucleic Acids Research*, **42**, e119.  
860
- 861 Louisiana State University Agricultural Center (2016) Louisiana Insect Pest Management Guide.  
862 [http://www.laca1.org/Pub%201838%20Insect%20Pest%20Management%20Guide%202016\\_complete](http://www.laca1.org/Pub%201838%20Insect%20Pest%20Management%20Guide%202016_complete%20book.pdf)  
863 [%20book.pdf](http://www.laca1.org/Pub%201838%20Insect%20Pest%20Management%20Guide%202016_complete%20book.pdf)  
864
- 865 Lowry DB, Hoban S, Kelley JL, Lotterhos KE, Reed LK, Antolin MF, Storfer A (2017) Breaking RAD:  
866 an evaluation of the utility of restriction site-associated DNA sequencing for genome scans of  
867 adaptation. *Mol Ecol Res* 17: 142-152.  
868
- 869 Luo R, Liu B, Xie Y, Li Z, Huang W, Yuan J, He G, Chen Y, Pan Q, Liu Y, Tang J, Wu G, Zhang H, Shi  
870 Y, Liu Y, Yu C, Wang B, Yao L, Han C, Cheung DW, Yiu S, Peng S, Xiaoqian Z, Liu G, Liao X, Li Y,  
871 Yang H, Wang J, Lam T, Wang, J (2012) SOAPdenovo2: an empirically improved memory-efficient  
872 short-read de novo assembler. *GigaScience*, **1**, 18.  
873
- 874 Luttrell RG, Roush RT, Ali A, Mink JS, Reid MR (1987) Pyrethroid resistance in field populations of  
875 *Heliothis virescens* (Lepidoptera: Noctuidae) in Mississippi in 1986. *J Econ Entomol*, **80**, 985-989.  
876
- 877 Magoc T, Salzberg S (2011) FLASH: Fast length adjustment of short reads to improve genome  
878 assemblies. *Bioinformatics*, **27**, 2957-2963.  
879
- 880 Mao Y, Cai W, Wang J, Hong G, Tao X, Want L, Huang Y, Chen X (2007) Silencing a cotton bollworm  
881 P450 monooxygenase gene y plant-mediated RNAi impairs larval tolerance of gossypol. *Nature*  
882 *Biotechnology* **25**, 1307-1313.  
883
- 884 Martin M (2011) Cutadapt removes adapter sequences from high-throughput sequencing reads.  
885 *EMBnet.journal*, **17**, 10.  
886
- 887 Nadeau NJ, Ruiz M, Salazar P, Counterman B, Medina JA, Ortiz-Zuazaga H, Morrison A, McMillan  
888 WO, Jiggins CD, Papa R (2014) Population genomics of parallel hybrid zones in the mimetic  
889 butterflies, *H. melpomene* and *H. erato*. *Genome Res*, **24**, 1316-1333.  
890
- 891 NASEM, National Academies of Sciences, Engineering, and Medicine (2016) *Genetically Engineered*  
892 *Crops: Experiences and Prospects*. Washington, DC: The National Academies Press.  
893
- 894 Nielsen R (2005) Molecular signatures of natural selection. *Annu. Rev. Gen.*, **39**, 97-218.  
895
- 896 Onstad, DW (2014) *Insect Resistance Management (Second Edition) Biology, Economics, and*  
897 *Prediction*. Elsevier Ltd. ISBN: 978-0-12-396955-2  
898
- 899 Oppenheim SJ, Gould F, Hopper KR (2012) The genetic architecture of a complex ecological trait in

- 900 the specialist moth *Heliothis subflexa*. *Evolution*, **66(11)**, 3336-3351.  
901
- 902 Pais AL, Whetten RW, Xiang Q (2016) Ecological genomics of local adaptation in *Cornus florida* L. by  
903 genotyping by sequencing. *Ecology and Evolution*, **00**, 1–25. doi:10.1002/ece3.2623  
904
- 905 Palumbi SR (2001) Humans as the world's greatest evolutionary force. *Science*, **293**, 1786-1790.  
906
- 907 Park S, Brown TM (2002) Linkage of genes for sodium channel and cytochrome P450 (CYP6B10) in  
908 *Heliothis virescens*. *Pest management science*, **58**, 209-212.  
909
- 910 Park Y, Taylor MFJ (1997) A novel mutation L1029H in sodium channel gene hscp associated with  
911 pyrethroid resistance for *Heliothis virescens* (Lepidoptera Noctuidae). *Insect Biochem. Mol. Biol.*, **27**,  
912 9-13.  
913
- 914 Park Y, Taylor MFJ, Feyereisen R (1997) A Valine421 to Methionine mutation in IS6 of the hscp  
915 voltage-gated sodium channel associated with pyrethroid resistance in *Heliothis virescens* F. *Biochem.*  
916 *Biophys. Res. Com.*, **239**, 688-691.  
917
- 918 Peterson BK, Weber JN, Kay EH, Fisher H., Hoekstra HE (2012) Double digest RADseq: An  
919 inexpensive method of de novo SNP discovery and genotyping in model and non-model species. *PLoS*  
920 *ONE*, **7**, e37135.  
921
- 922 Price AL, Jones NC, Pevzner PA (2005) De novo identification of repeat families in large genomes. To  
923 appear in Proceedings of the 13th Annual International conference on Intelligent Systems for Molecular  
924 Biology (ISMB-05). Detroit, Michigan.  
925
- 926 Pujolar JM, Jacobson MW, Als TD, Frydenberg J, Munch K, Jonsson B, Jian JB, Cheng L, Maes GE,  
927 Bernatchez L, Hansen MM (2014) Genome-wide single-generation signatures of local selection in the  
928 panmictic European eel. *Molecular Ecology*, **23**, 2514-2528.  
929
- 930 Quinlan AR, Hall IM (2010) BEDTools: a flexible suite of utilities for comparing genomic features.  
931 *Bioinformatics*. **26**, 841–842.  
932
- 933 R Core Team (2014). R: A language and environment for statistical computing. R Foundation for  
934 Statistical Computing, Vienna, Austria.  
935
- 936 Remmert M, Biegert A, Hauser A, Soding J (2012) HHblits: lightning-fast iterative protein sequence  
937 searching by HMM-HMM alignment. *Nat Meth*, **9**, 173–175.  
938
- 939 Rinkevich FD, Du Y, and Dong K (2013) Diversity and convergence of sodium channel mutations  
940 involved in resistance to pyrethroids. *Pesticide Biochemistry and Physiology*, **106(3)**, 93-100.  
941

- 942 Ruegg K, Anderson EC, Boone J, Pouls J, Smith TB (2014) A role for migration-linked genes and  
943 genomic islands in divergence of a songbird. *Mol Ecol*, **23**, 4757-4769.  
944
- 945 Robinson JT, Thorvaldsdóttir H, Winckler W, Guttman M, Lander ES, Getz G, Mesirov JP (2011)  
946 Integrative Genomics Viewer. *Nature Biotechnology* **29**, 24–26.  
947
- 948 Sheck AL, Gould F (1993) The genetic basis of host range in *Heliothis virescens*: larval survival and  
949 growth. *Entomol. Exp. Appl.*, **69**, 157-172.  
950
- 951 Sheck AL, Gould F (1995) Genetic analysis of differences in oviposition preferences of *Heliothis*  
952 *virescens* and *H. subflexa* (Lepidoptera: Noctuidae). *Environ. Entomol.*, **24(2)**, 311-347.  
953
- 954 Simao FA, Waterhouse RM, Ioannidis P, Kriventseva EV, Zdobnov EM (2015) BUSCO: assessing  
955 genome assembly and annotation completeness with single-copy orthologs. *Bioinformatics* doi:  
956 10.1093/bioinformatics/btv351  
957
- 958 Smajda CM, Canback B, Vitalis R, Gautier M, Ferrari J, Zhou J, Butlin RK (2012) Large-scale  
959 candidate gene scan reveals the role of chemoreceptor genes in host plant specialization and speciation  
960 in the pea aphid. *Evolution* **66(9)**, 2723-2738.  
961
- 962 Smit AFA, Hubley R, Green P (2013) *RepeatMasker Open-4.0*.  
963
- 964 Stanke M, Keller O, Gunduz I, Hayes A, Waack S, Morgenstern B (2006) AUGUSTUS: Ab initio  
965 prediction of alternative transcripts. *Nucleic Acids Research*, **34**.  
966
- 967 Sudbrink DL, Grant JF (1995) Wild host plants of *Helicoverpa zea* and *Heliothis virescens*  
968 (Lepidoptera: Noctuidae) in Eastern Tennessee. *Environ. Entomol.*, **24(5)**, 1080-1085.  
969
- 970 Tabashnik BE, Brevault T, Carriere Y (2013) Insect resistance to Bt crops: lessons from the first billion  
971 acres. *Nature Biotechnology*, **31**, 510-521.  
972
- 973 Taylor M, Shen Y, Kreitman M (1995) A population genetic test of selection at the molecular level.  
974 *Science*, **270**, 1497-1499.  
975
- 976 Petr Danecek, Adam Auton, Goncalo Abecasis, Cornelis A. Albers, Eric Banks, Mark A. DePristo,  
977 Robert Handsaker, Gerton Lunter, Gabor Marth, Stephen T. Sherry, Gilean McVean, Richard Durbin  
978 and 1000 Genomes Project Analysis Group (2011) The Variant Call Format and VCFtools.  
979 *Bioinformatics*, **27 (15)**, 2156-2158.  
980
- 981 Tilman D, Fargione J, Wolff B, D'Antonio C, Dobson A, Howarth R, Schindler D, Schelesinger WH,  
982 Simberloff D, Swackhamer D (2001). Forecasting agriculturally driven global environmental change.  
983 *Science*, **292**, 281-284.  
984

985 [USEPA] U.S. Environmental Protection Agency (1998) The environmental protection agency's white  
986 paper on Bt plant-pesticide resistance management. Washington: [http://www.epa.gov/scipoly/sap/  
987 meetings/1998/february/finalfeb.pdf](http://www.epa.gov/scipoly/sap/meetings/1998/february/finalfeb.pdf)  
988

989 [USEPA] U.S. Environmental Protection Agency (2001) Biopesticides registration action document:  
990 *Bacillus thuringiensis* plant-incorporated protectants. [http://www.epa.gov/pesticides/biopesticides/  
991 pips/bt\\_brad.htm](http://www.epa.gov/pesticides/biopesticides/pips/bt_brad.htm)  
992

993 [USEPA] U.S. Environmental Protection Agency (2006) Analysis of a Natural Refuge of Non-Cotton  
994 Hosts for Monsanto's Bollgard II Cotton. FIFRA Scientific Advisory Panel Meeting June 13-15, 2006.  
995 Arlington, Virginia. 101pgs.  
996

997 Verhoeven KJF, Simonsen KL, McIntyre LM (2005) Implementing false discovery rate control:  
998 increasing your power. *Oikos*, 108(3), 643-647.  
999

1000 Yue LN, Yang YH, Wu SW, WU YD (2007) Cloning and mRNA expression levels of cytochrome P450  
1001 genes *CYP6AE12* and *CYP9A18* in the cotton bollworm, *Helicoverpa armigera*. *ACTA Entomologica  
1002 Sinica*, **50**, 234-240.  
1003

1004 Zhao Y, Park Y, and Adam ME (2000). Functional and evolutionary consequences of pyrethroid  
1005 resistance mutations in S6 transmembrane segments of a voltage-gated sodium channel. *Biochemical  
1006 and Biophysical Research Communications* 278: 516-521.  
1007

1008 Zhou X, Sheng C, Li M, Wan H, Liu D, Qui X (2010). Expression responses of nine cytochrome p450  
1009 genes to xenobiotics in the cotton bollworm *Helicoverpa armigera*. *Pesticide Biochemistry and  
1010 Physiology* 97:209-213.  
1011

1012

1013 **Tables**

1014 **Table 1** – Number of SNPs with pairwise  $F_{ST}$  values deemed as significantly divergent according to  
1015 Lositan analysis for each by-year comparison. The number of unique scaffolds (of 8826) containing at  
1016 least 1 significantly diverged SNP, as well as the average and maximum numbers of putative genes  
1017 within 36 kb of the outlier SNP is also included.

| Pairwise Comparisons | Total SNPs | Number Outlier SNPs | Number Scaffolds Containing Outliers | Mean Number Putative Genes within 36 kb of Outlier SNPs | Max Number Putative Genes within 36 kb of Outlier SNPs |
|----------------------|------------|---------------------|--------------------------------------|---------------------------------------------------------|--------------------------------------------------------|
| 1997-2007            | 8963       | 201                 | 190                                  | 2.6                                                     | 12                                                     |
| 2007-2012            | 8963       | 35                  | 33                                   | 2.6                                                     | 10                                                     |
| 1997-2012            | 8963       | 184                 | 170                                  | 2.7                                                     | 10                                                     |

1018

1019

1020 **Figures**

1021

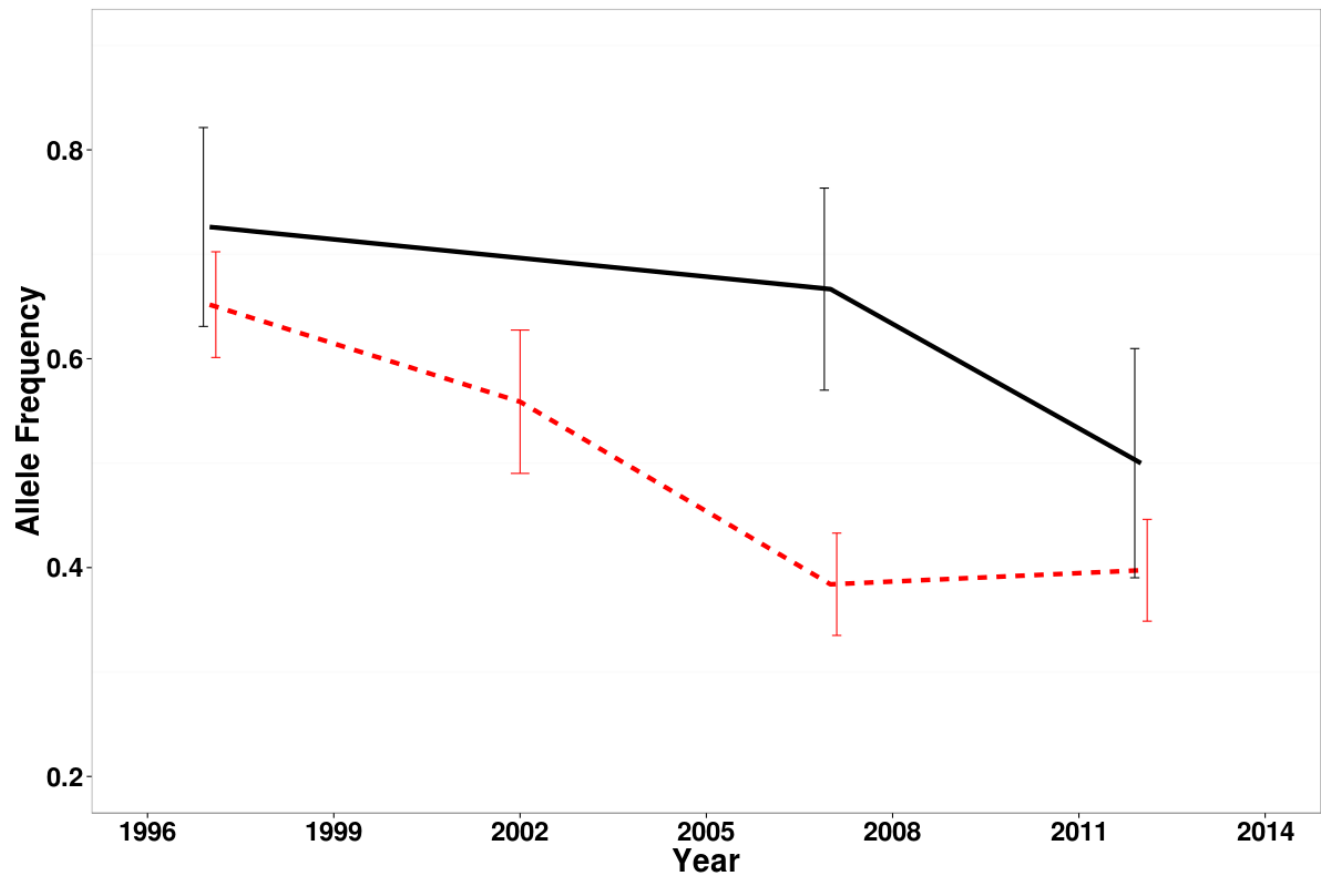

1023 **Figure 1** – The decline in the frequency of the pyrethroid resistance allele in *H. virescens* (pooled LA  
1024 and TX samples), represented by the dashed red line, was statistically significant over the course of our  
1025 15 year sampling period (n = 659). A unique ddRAD-seq haplotype, represented by the solid black  
1026 line, was found *ca.* 36Kb upstream from the alpha subunit of the *Vgsc* and also declined in frequency in  
1027 the subset of individuals (n = 141) sequenced for our genome scan. Error bars represent bootstrapped  
1028 95% confidence intervals (N = 5000) around the mean of each year.

1029



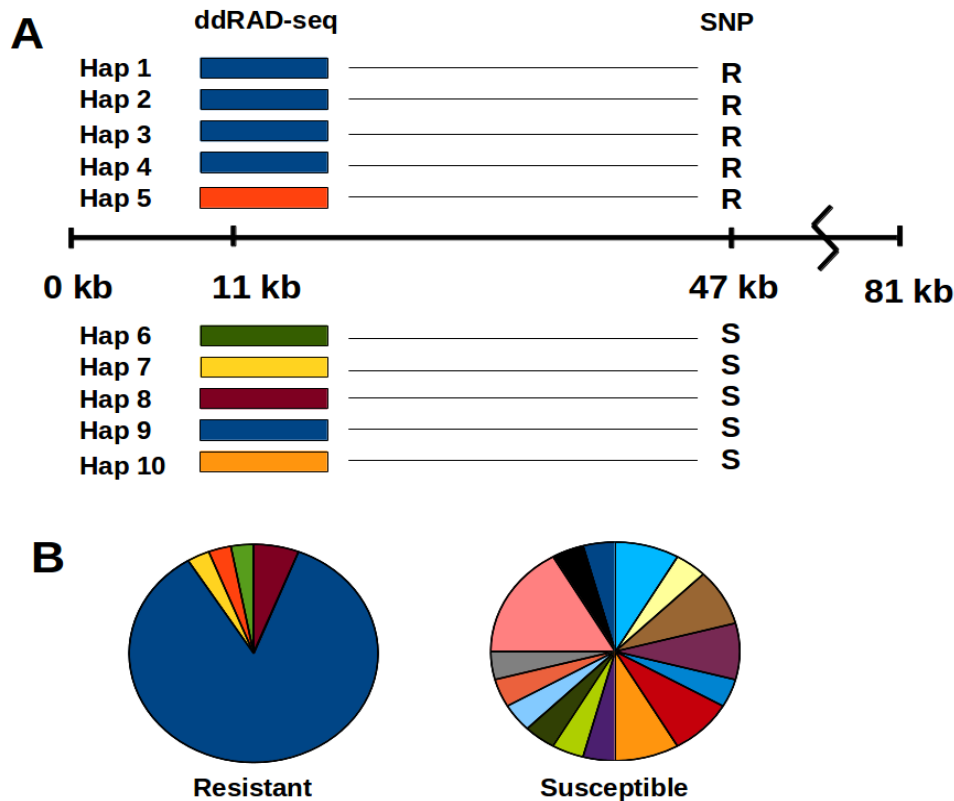

1030 **Figure 2** – Significantly greater diversity was observed from ddRAD-seq haplotypes linked to the  
 1031 susceptible *Vgsc* allele relative to those linked to the resistance allele. (A) is a visualization of the  
 1032 relationship of *Hv\_11322* to the L1029H *Vgsc* SNP along an 81kb genome scaffold. The different  
 1033 colored bars at 11kb represent unique alleles at the *Hv\_11322* locus, showing a greater diversity of  
 1034 *Hv\_11322* alleles were found to be associated with the *Vgsc* wild-type allele, relative to the resistance  
 1035 allele as would be indicative of a selective sweep. Due to the number of unique *Hv\_11322* alleles  
 1036 found to be associated with each *Vgsc* allele ( $n = 5$  and  $n = 15$  for resistant and wild-type, respectively),  
 1037 full representation of this diversity could not be incorporated into (A). However, the unique colors in  
 1038 (B) depict the number and proportion of *Hv\_11322* alleles linked to the *Vgsc* resistant ( $n = 34$ ) and  
 1039 susceptible ( $n = 24$ ) SNP alleles. Each unique color represents a different *Hv\_11322* allele. The dark  
 1040 blue wedges always represent *Hv\_11322*\_hap 1.

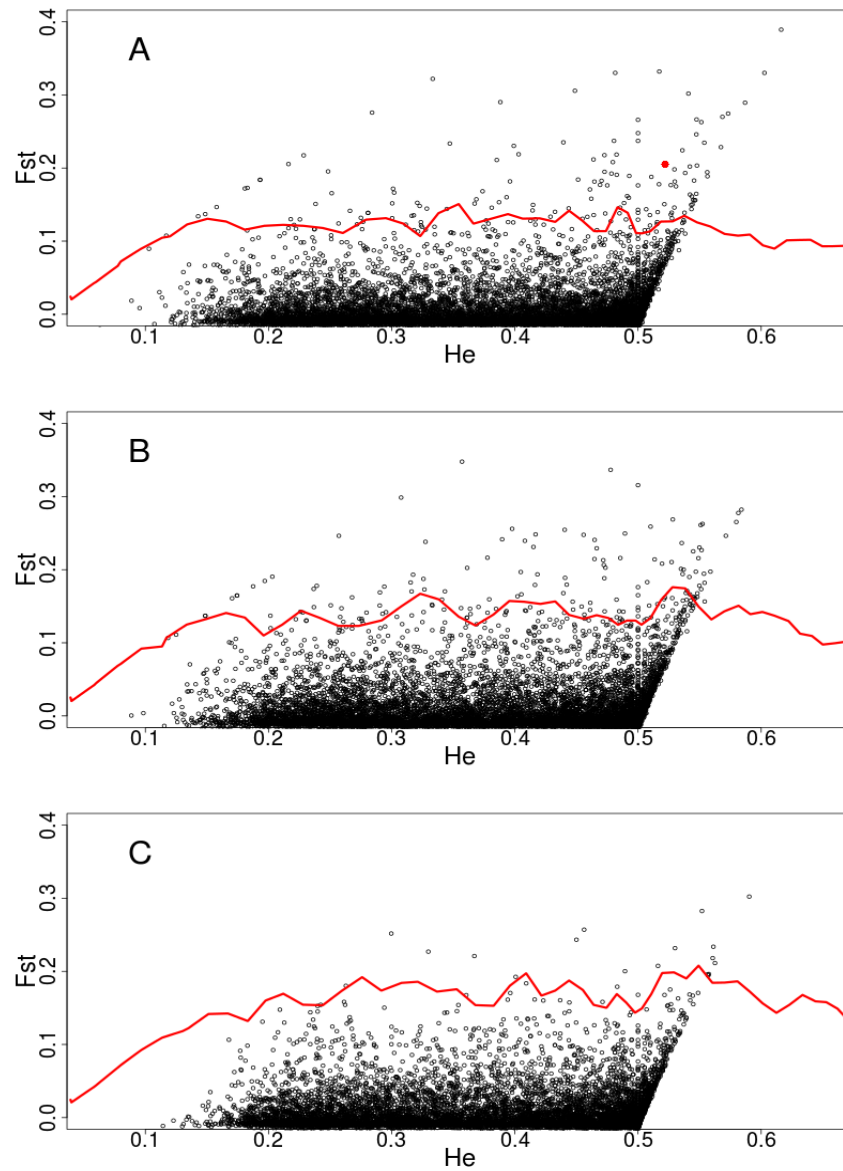

1041 **Figure 3** – Pairwise genetic divergence according to Weir and Cockerham's FST for populations of *H.*  
1042 *virescens* collected in the years A) 1997 and 2012, B) 1997 and 2007, C) 2007 and 2012. Each black  
1043 point represents one SNP of 8,963 along the *H. virescens* genome. Points above the red line represent  
1044 loci with pairwise genetic divergence that is statistically significant at the  $\alpha = 0.01$  level following  
1045 correction for false discovery. Pairwise genetic divergence at the SNP near the *Vgsc* on Scaffold 4600  
1046 is represented by the red point on panel A.

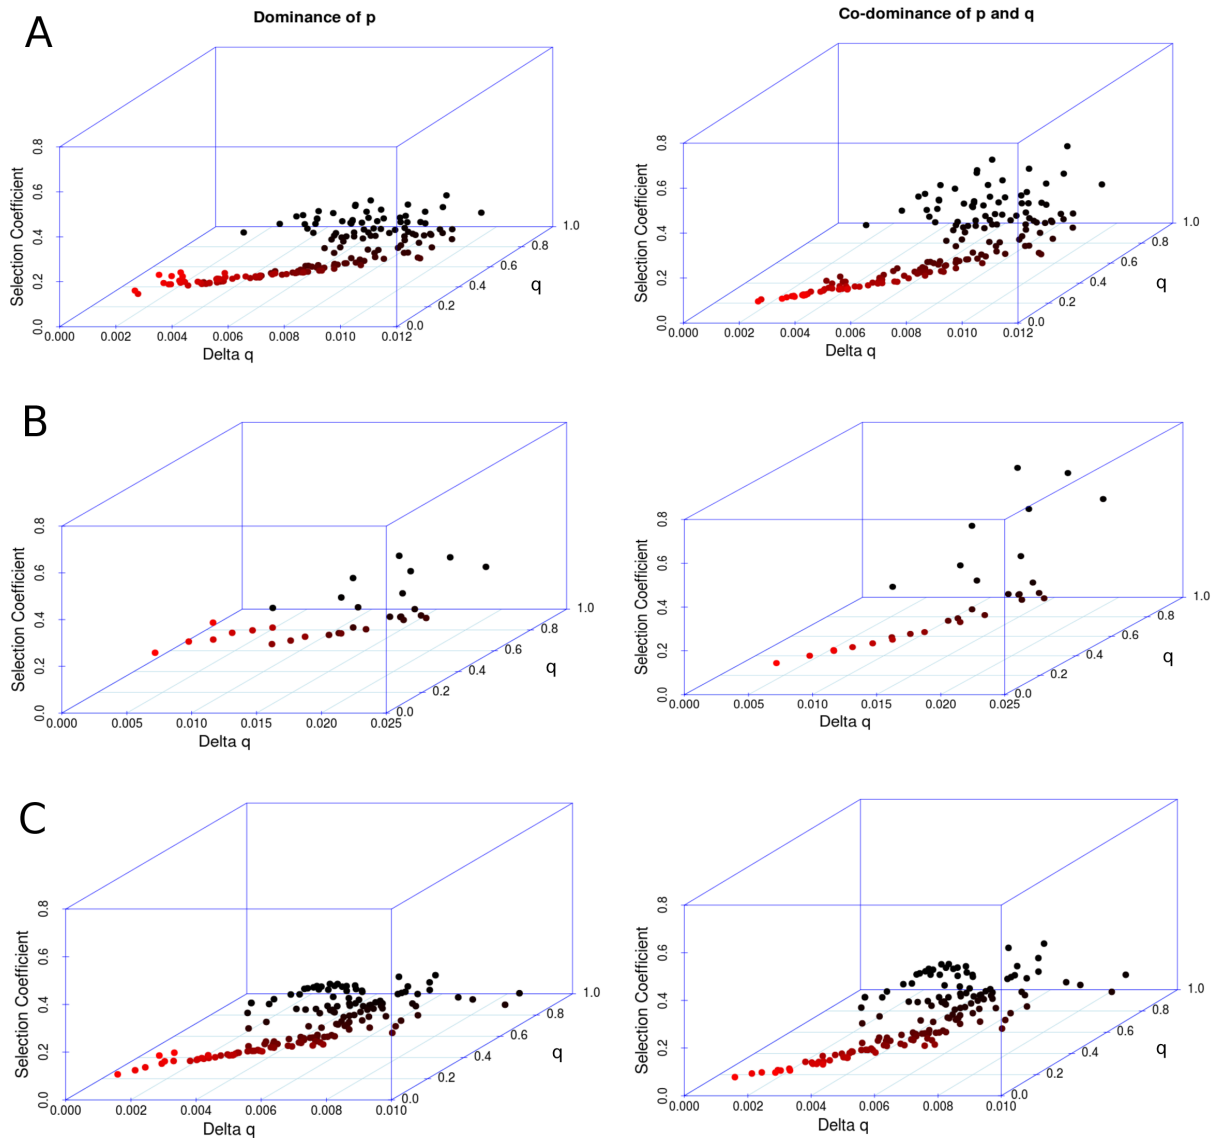

1047 **Figure 4** – Selection coefficients associated with SNP outliers where the initial frequency of p was  
1048 greater than 0.05. Selection against q is plotted against the rate of allele frequency change and the  
1049 initial starting frequency of q. Colors for each plotted point help to visualize the initial starting  
1050 frequency of q, where red is low and black is high. Plots in rows A, B, and C represent selection  
1051 coefficients calculated assuming dominance and codominance of p for each of the by-year comparisons  
1052 1997-2007, 2007-2012, and 1997-2012, respectively.
